# Supplementary material for: Present state of reproductive medicine in Japan – ethical issues with a focus on those seen in court cases
Source: Springer Nature journal article supplement (doi:10.1186/1472-6939-7-3), 2006-04-05
Supplement: Additional file 3 [file 1472-6939-7-3-s3.pdf]

## Table 3 Aspects of ART-related problems

|     |                         |                                                                                                                                       |
|-----|-------------------------|---------------------------------------------------------------------------------------------------------------------------------------|
| i   | <b>Technical aspect</b> | Continuing technological development of ART may result in as yet inadequately researched side-effects and unforeseen social problems. |
| ii  | <b>Social aspect</b>    | Social prejudice against infertility and ART highlights need for support system. Volatility of public opinion.                        |
| iii | <b>Legal aspect</b>     | Need for prompt and comprehensive legislation that can be adapted to meet technical advances.                                         |
| iv  | <b>Economic aspect</b>  | Inequality and inadequacy of financial support puts additional financial burden on less well-off families.                            |
| v   | <b>Family aspect</b>    | Possibility of conflict between the rights of children and the rights of parents.                                                     |
| vi  | <b>Ethical aspect</b>   | Problem of where to draw the line in terms of the intervention of science into the act of human reproduction.                         |
